# Supplementary material
Source: PubMed Central journal article supplement (PMC6309989)
Supplement: NIHMS1505824-supplement-7.pdf [file NIHMS1505824-supplement-7.pdf]

Table S2. List of Primers for Key Resources Table

| Primer Name                 | Primer Sequence (5'-3')                                                |
|-----------------------------|------------------------------------------------------------------------|
| <b>WNV primers</b>          |                                                                        |
| WNV RNA: Forward            | 5'-TCAGCGATCTCTCCACCAAAG-3'                                            |
| WNV RNA: Reverse            | 5'-GGGTCAGCACGTTTGTCAATTG-3'                                           |
| WNV RNA: Probe              | 5'-/56-FAM/TGCCCGACC/Zen/ATGGGAGAAGCTC/3IABkFQ/-3'                     |
| <b>ZIKV primers</b>         |                                                                        |
| ZIKV RNA: Forward           | 5'-CCACCAATGTTCTCTTGCAGACATATTG-3'                                     |
| ZIKV RNA: Reverse           | 5'-TTCGGACAGCCGTTGTCCAACACAAG-3'                                       |
| ZIKV RNA: Probe             | 5'-/56-FAM/AGCCTACCT/Zen/TGACAAGCAGTC/3IABkFQ/-3'                      |
| <b>CHIKV primers</b>        |                                                                        |
| CHIK RNA: Forward           | 5'-TCGACGCGCCCTCTTTAA-3'                                               |
| CHIK RNA: Reverse           | 5'-ATCGAATGCACCGCACACT-3'                                              |
| CHIK RNA: Probe             | 5'-/56-FAM/ACCAGCCTG/ZEN/CACCCATTCTCAGAC/3IABkFQ/-3'                   |
| <b>VEEV TC-83 primers</b>   |                                                                        |
| TC-83 RNA: Forward          | 5'-ACCGAGAGCTGGTTAGGAGA-3'                                             |
| TC-83 RNA: Reverse          | 5'-GTCAAAGTCTTCAGCCGACA-3'                                             |
| TC-83 RNA: Probe            | 5' - / 5 6 -<br>FAM / TGCGGTCCT / Zen / GCTTCCGAACA / 3 IABkFQ / - 3 ' |
| <b>POWV Spooner primers</b> |                                                                        |
| POWV RNA: Forward           | 5'-GCAGCACCATAGGTAGAATGT-3'                                            |
| POWV RNA: Reverse           | 5'-CCACCCACTGAACCAAAGT-3'                                              |
| POWVRNA: Probe              | 5'-/56-FAM/TC TCA GTG G /Zen/T TGG AGA ACA CGC AT<br>/3IABkFQ/-3'      |
| <b>Kunjin primers</b>       |                                                                        |
| Kun RNA: Forward            | 5'-TCAGTGAACCCATCTCCAAGG-3'                                            |
| Kun RNA: Reverse            | 5'-GGGTCAGCCCGCTTGTCAATTA-3'                                           |
| Kun RNA: Probe              | 5'-/56-FAM/TGC CCA ACC ATG GGG GAA GCC C/36-TAMSp/-<br>3'              |
